# Supplementary material for: Green tea polyphenol–reduced graphene oxide: derivatisation, reduction efficiency, reduction mechanism and cytotoxicity
Source: Royal Society of Chemistry journal article supplement (doi:10.1039/c4ra04292a), 2014-01-01
Supplement: c4ra04292a1.pdf [file c4ra04292a1.pdf]

## Supporting Information

### Green tea polyphenol-reduced graphene oxide: Derivatisation, reduction efficiency, reduction mechanism and cytotoxicity

M. F. Abdullah<sup>a, b</sup>, R. Zakaria<sup>a</sup>, S. H. S. Zein<sup>a, c, \*</sup>

<sup>a</sup>*School of Chemical Engineering, Engineering Campus, Universiti Sains Malaysia, 14300, Seri Ampangan, Nibong Tebal, Seberang Perai Selatan, Pulau Pinang, Malaysia*

<sup>b</sup>*School of Bioprocess Engineering, Universiti Malaysia Perlis, Kompleks Pusat Pengajian Jejawi 3, 02600, Arau, Perlis, Malaysia*

<sup>c</sup>*Department of Engineering, University of Hull, HU6 7RX, Hull, United Kingdom*

\* Corresponding author. Tel.: +44 (0) 1482 466753.  
E-mail address: [S.H.Zein@hull.ac.uk](mailto:S.H.Zein@hull.ac.uk) (S.H.S Zein).

#### Contents

Fig. S1.....Page S2

Table S1.....Page S3

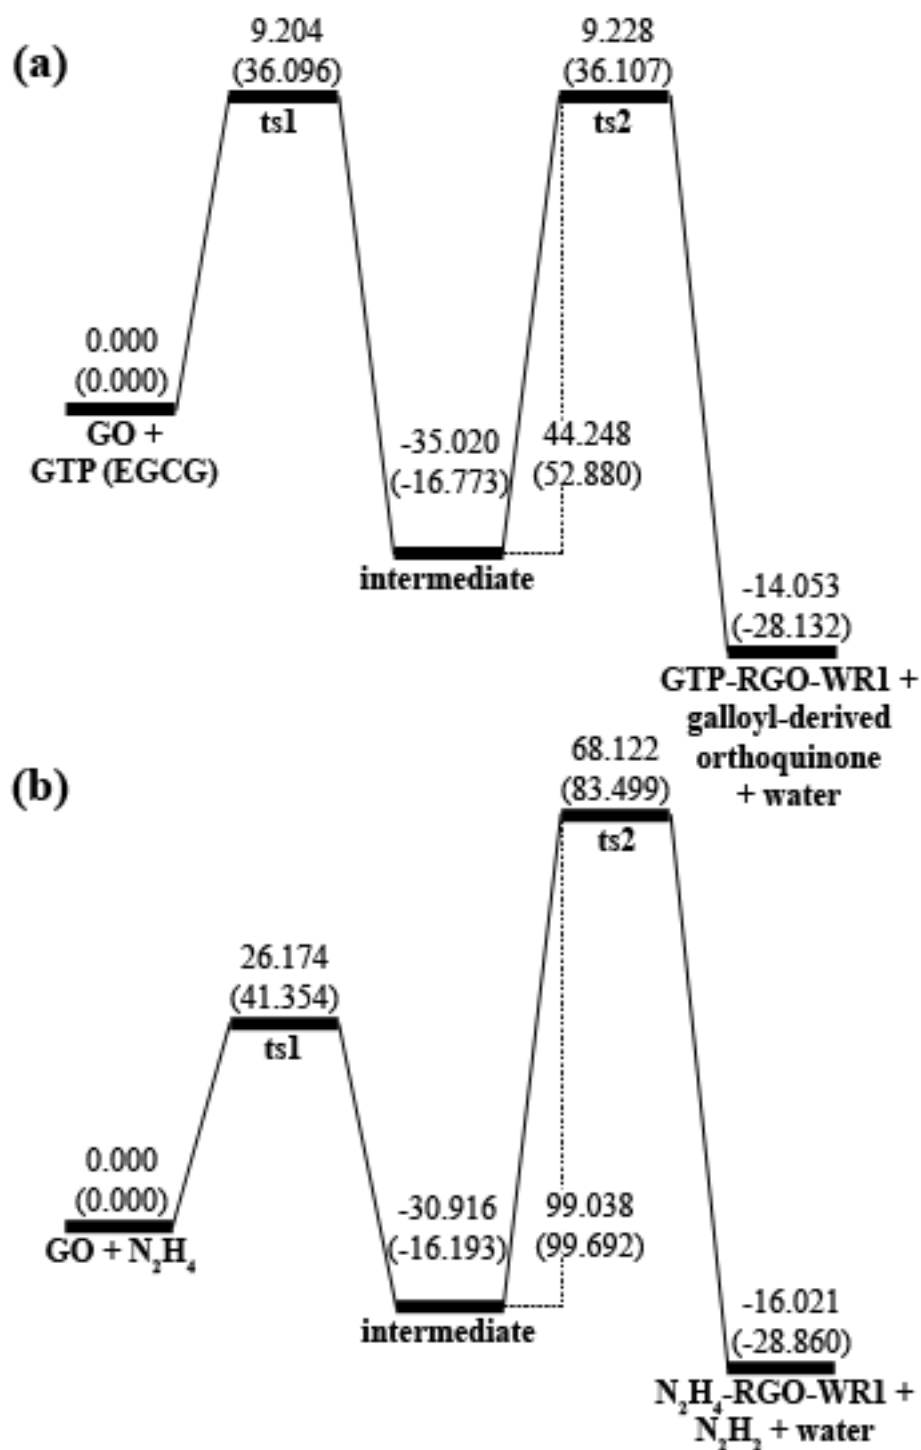

**Fig. S1.** Reaction energy profiles for the GO reduction using (a) GTP and (b) N<sub>2</sub>H<sub>4</sub> calculated at the functional theory level of B3LYP/3-21G. The values of  $\Delta H$  (kcal/mol) and  $\Delta G$  (kcal/mol) at 90°C were shown in normal typefaces without and with parentheses, respectively.

**Table S1.** Calculated total energies ( $E_{\text{total}}$ ), entropies (S), Gibbs free energies (G), enthalpies (H) and zero-point energies (ZPE) for species investigated in this study at the functional theory level of B3LYP/3-21G.

| Species                               |              | $E_{\text{total}}$ (a.u.)                                                            | S<br>(cal.mol <sup>-1</sup> K <sup>-1</sup> ) | G (a.u.) | H (a.u.)   | ZPE<br>(a.u.) |        |
|---------------------------------------|--------------|--------------------------------------------------------------------------------------|-----------------------------------------------|----------|------------|---------------|--------|
| GO +<br>GTP<br>(EGCG)                 | reactant     | GO +<br>epoxide<br>EGCG                                                              | -305.5824                                     | 78.4650  | -305.6267  | -305.5813     | 0.1041 |
|                                       | ts1          |                                                                                      | -1666.9518                                    | 215.0720 | -1667.0751 | -1666.9506    | 0.3773 |
|                                       | intermediate |                                                                                      | -1972.5184                                    | 219.4850 | -1972.6443 | -1972.5172    | 0.4703 |
|                                       | ts2          |                                                                                      | -1972.5889                                    | 243.2910 | -1972.7285 | -1972.5877    | 0.4869 |
|                                       | product      | GTP-RGO-<br>WR1<br>galloyl-<br>derived<br>orthoquinone<br>water                      | -230.8678                                     | 72.8740  | -230.9088  | -230.8667     | 0.1017 |
|                                       |              |                                                                                      | -1665.7392                                    | 212.5490 | -1665.8610 | -1665.7380    | 0.3547 |
|                                       |              |                                                                                      | -75.9507                                      | 46.8830  | -75.9767   | -75.9496      | 0.0198 |
| GO +<br>N <sub>2</sub> H <sub>4</sub> | reactant     | GO +<br>epoxide<br>N <sub>2</sub> H <sub>4</sub>                                     | -305.5824                                     | 78.4650  | -305.6267  | -305.5813     | 0.1041 |
|                                       | ts1          |                                                                                      | -111.1723                                     | 59.9340  | -111.2058  | -111.1711     | 0.0517 |
|                                       | intermediate |                                                                                      | -416.7119                                     | 96.5980  | -416.7666  | -416.7107     | 0.1574 |
|                                       | ts2          |                                                                                      | -416.8029                                     | 97.8570  | -416.8583  | -416.8017     | 0.1596 |
|                                       | product      | N <sub>2</sub> H <sub>4</sub> -RGO-<br>WR1<br>N <sub>2</sub> H <sub>2</sub><br>water | -416.6450                                     | 96.0560  | -416.6995  | -416.6439     | 0.1477 |
|                                       |              |                                                                                      | -230.8678                                     | 72.8740  | -230.9088  | -230.8667     | 0.1017 |
|                                       |              |                                                                                      | -109.9629                                     | 53.9950  | -109.9930  | -109.9617     | 0.0258 |
|                                       |              | -75.9507                                                                             | 46.8830                                       | -75.9767 | -75.9496   | 0.0198        |        |

\*1 a.u. = 627.5 kcal/mol
